# Supplementary material
Source: Springer Nature journal article supplement (https://www.springermedizin.de/resource/supplementary/12889_2013_6404_MOESM1_ESM.pdf/9497850)
Supplement: MOESM1 [file 9497850]

**Additional File 1. Changes in children’s center-level zBMIs from pre- to post-intervention  
(n=17 centers)**

| <b>Variable</b>                                  | <b>Coefficient estimate<br/>(SE)</b> | <b>95% CI</b> | <b>t-statistic(df)</b> | <b>p-value</b> |
|--------------------------------------------------|--------------------------------------|---------------|------------------------|----------------|
| California<br>(Reference: North<br>Carolina)     | 0.13 (0.10)                          | (-0.10,0.36)  | 1.21(11)               | 0.25           |
| Connecticut<br>(Reference: North<br>Carolina)    | 0.15 (0.10)                          | (-0.08,0.37)  | 1.47(11)               | 0.17           |
| Parent education<br>(reference: ≤High<br>School) | 0.59 (0.31)                          | (-0.11,1.28)  | 1.87(11)               | 0.09           |
| Poverty level<br>(reference: ≤100% FPG)          | 0.03 (0.23)                          | (-0.47,0.54)  | 0.15(11)               | 0.88           |
| Intervention<br>(reference: controls)            | -0.26 (0.10)                         | (-0.47,-0.04) | -2.63(11)              | 0.02           |
| Intercept                                        | -0.36 (0.27)                         | (-0.96,0.24)  | -1.32(11)              | 0.22           |

Note: Multiple regression model controlling for state, parent education and family poverty status:  
Overall model  $R^2=.42$ , F statistic(df)=1.57(5), p=0.25  
FPG = Federal Poverty Guidelines; zBMI = age- and sex-specific standardized body mass index
